# Supplementary material for: The role of the ionic liquid C6C1ImTFSI in the sol–gel synthesis of silica studied using in situ SAXS and Raman spectroscopy
Source: Royal Society of Chemistry journal article supplement (doi:10.1039/c5cp00709g), 2015-01-01
Supplement: c5cp00709g1.pdf [file c5cp00709g1.pdf]

## Supporting Information for the article:

### Role of the ionic liquid $C_6C_1\text{ImTFSI}$ in the sol-gel synthesis of silica studied by *in situ* SAXS and Raman spectroscopy<sup>‡</sup>

Moheb Nayeri<sup>\*a</sup> Kim Nygård,<sup>b</sup> Maths Karlsson,<sup>c</sup> Manuel Marechal,<sup>d</sup> Manfred Burghammer,<sup>e</sup> Michael Reynolds,<sup>e</sup> and Anna Martinelli<sup>\*a</sup>

In what follows seven supplementary figures (Fig. SI-I – Fig. SI-VII) are provided, which are referred to in the main text of the manuscript.

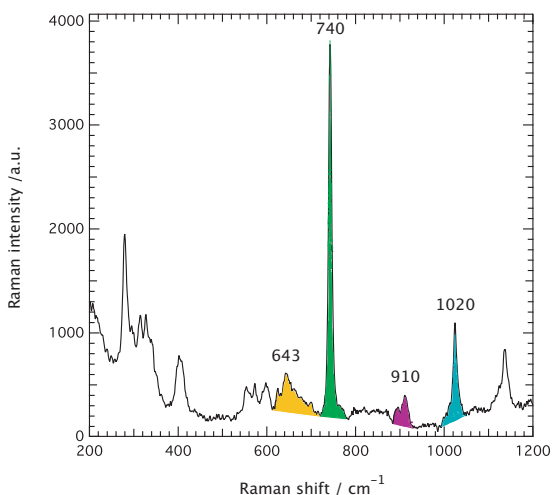

**Fig. SI-I.** This figure shows the typical Raman spectrum of an ionogel containing the ionic liquid 1-hexyl-3-methylimidazolium bis(trifluoromethanesulfonyl)imide,  $C_6C_1\text{ImTFSI}$ . The Raman vibrations arising from TMOS ( $643\text{ cm}^{-1}$ ), the TFSI anion ( $740\text{ cm}^{-1}$ ), methyl formate ( $910\text{ cm}^{-1}$ ), and methanol ( $1020\text{ cm}^{-1}$ ) are emphasized in color. The colored areas correspond to the integrated Raman intensities, which we monitor as a function of time to investigate the reaction evolution.

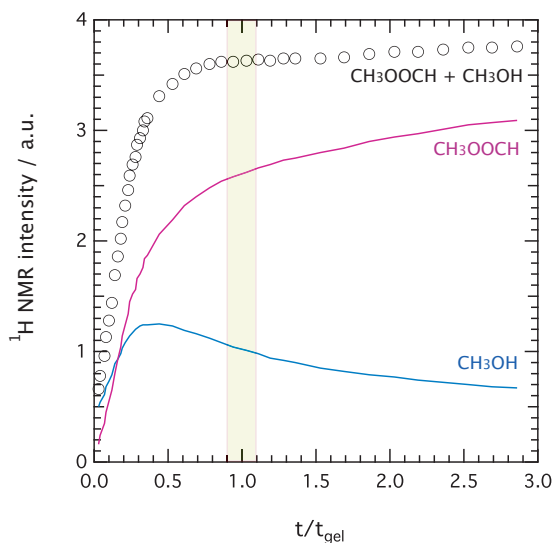

**Fig. SI-II.** This figure shows the  $^1\text{H}$  NMR intensities previously reported in reference [19] for  $x=1$  and here revisited to show the dependence on time of the added intensities (black) of the polar molecules methanol (blue) and methyl formate (purple).

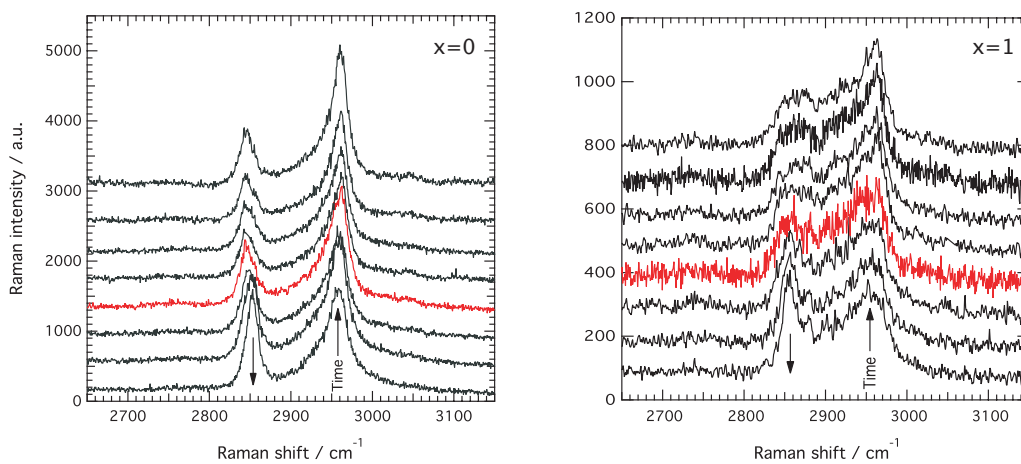

**Fig. SI-III.** This figure shows the time evolution of the Raman spectra recorded for  $x=0$  and  $x=1$  in the C–H stretching region. As reaction time progresses (see arrows), the low-frequency component mainly attributed to TMOS decreases with respect to the high-frequency one, which contains also contributions from methanol and methyl formate. Raman spectra recorded at the time of gelation are shown in red.

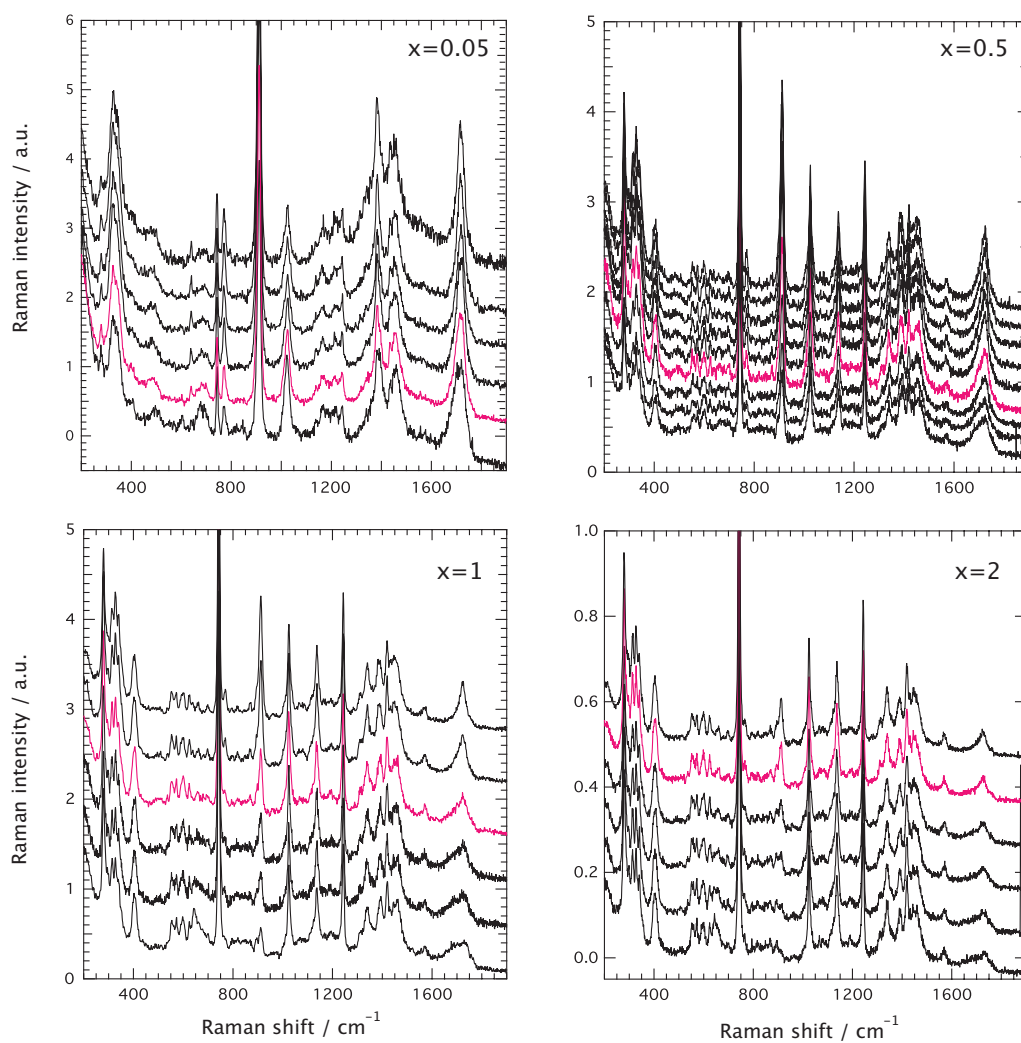

**Fig. SI-IV.** This figure shows the time evolution of the Raman spectra recorded for solutions with different ionic liquid content, *i.e.* for  $x=0.05$  (top-left),  $x=0.5$  (top-right),  $x=1$  (bottom-left), and  $x=2$  (bottom-right). The Raman spectra recorded at the time of gelation, that is at  $t_{gel}$ , are shown in red.

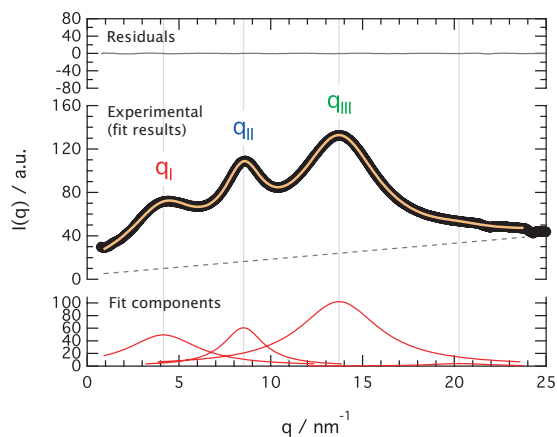

**Fig. SI-V.** This figure shows the peak-fit procedure employed to model the x-ray diffraction pattern of the ionic liquid  $C_6C_1ImTFSI$ . Three Lorentzian functions are used to account for the three peaks ( $q_I$ ,  $q_{II}$ , and  $q_{III}$ ) associated to non-polar and polar domains, and to tail-to-tail correlations, respectively. As can be deduced from the residual trace, this model describes very well the experimental data.

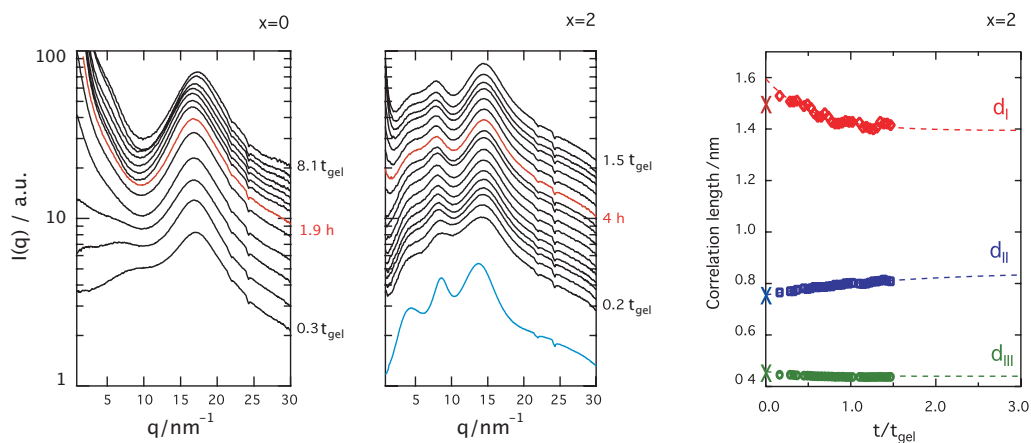

**Fig. SI-VI.** This figure shows the time evolution of the SAXS pattern for the sample with no ionic liquid ( $x=0$ ) and a sample with  $x=2$ . For the latter, the correlation lengths are also shown (right-most plot).

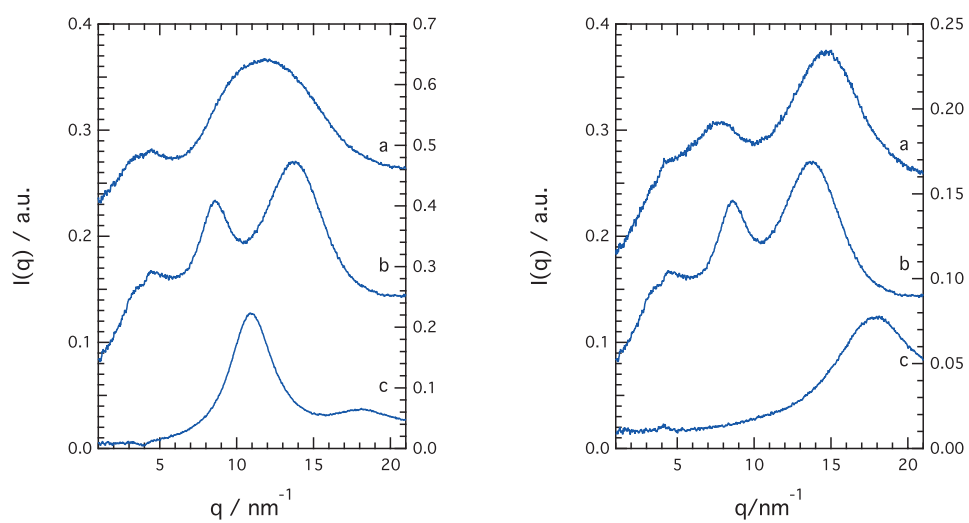

**Fig. SI-VII.** This figure shows the x-ray diffraction patterns recorded for the binary mixture  $C_6C_1\text{ImTFSI:TMOS}$  (left, a) and  $C_6C_1\text{ImTFSI:FA}$  (right, a). For comparison, the patterns of the pure ionic liquid (b, right and left), and TMOS (c, left) and formic acid (c, right) are also included.
